# Supplementary material
Source: PubMed Central journal article supplement (PMC10547129)
Supplement: NIHMS1922331-supplement-am-2021-20872k_SI_1.pdf [file NIHMS1922331-supplement-am-2021-20872k_SI_1.pdf]

## Supporting Information

### Transparent Anti-SARS-CoV-2 and Antibacterial Silver Oxide Coatings

Mohsen Hosseini,<sup>1</sup> Alex W. H. Chin,<sup>2,3</sup> Myra D. Williams,<sup>4</sup> Saeed Behzadinasab,<sup>1</sup> Joseph O. Falkinham III,<sup>4</sup> Leo L. M. Poon,<sup>\*2,3,5</sup> William A. Ducker<sup>\*1</sup>

\*Corresponding Authors' Email: Leo Poon llmpoon@hku.hk; William Ducker wducker@vt.edu

<sup>1</sup>Dept. of Chemical Engineering and Center for Soft Matter and Biological Physics, Virginia Tech, Blacksburg, Virginia, 24061, USA

<sup>2</sup>School of Public Health, LKS Faculty of Medicine, The University of Hong Kong, Hong Kong Special Administrative Region, Hong Kong, China.

<sup>3</sup>Centre for Immunity and Infection, Hong Kong Science Park, Hong Kong, Hong Kong, China

<sup>4</sup> Department of Biological Sciences, Virginia Tech, Blacksburg, Virginia, 24061, USA

<sup>5</sup>HKU-Pasteur Research Pole, LKS Faculty of Medicine, The University of Hong Kong, Hong Kong, China

#### Additional Methods:

##### Antibacterial Assay (Continued)

**Confirmation of Surface Killing.** It is in principle possible that the low counts that were observed on antimicrobial coating were due to a poor yield in rinsing bacteria off the coating prior to the assay. To rule out this possibility, we assayed *P. aeruginosa* and MRSA that remained adherent to the coupons after vortexing and sonication. These coupons were placed with the coating in contact with a TSA plate. After 10 min, the coupons were removed and plates incubated at 37° C to determine whether any adherent, viable cells were present on the coupons and able to form colonies. For the experiments reported here, no colonies appeared indicating that no viable cells remained adhering to the coupons.

**Surface Killing Not Influenced by Post Exposure to Particulate Silver.** It was possible that particulate silver oxide was released during the vortexing and sonication and could kill suspended cells during the assay, thereby giving the appearance that bacteria were killed on the coating. To rule out this possibility, in separate experiments, coupons were suspended in DE-buffer (BD, Sparks, MD) as well as PBS. DE buffer is composed of agents able to block or inhibit killing by a wide variety of antimicrobial agents, including metals.<sup>1</sup> For the experiments reported in this paper, there was no reduction in killing *P. aeruginosa* and MRSA when coupons were vortexed and sonicated in DE buffer, compared to PBS. Thus, there was no killing of suspended cells by silver oxide released from coupons.

## **EPA Abrasion Test**

Prior to distribution of antimicrobial coatings in the United States (US), the US Environmental Protection Agency (EPA) requires testing of the antimicrobial efficacy after abrasion. We carried out a variant of EPA-approved test to assess whether the coating was sufficiently durable. In this method, a sponge is repeatedly translated across a surface by a Gardco, Model D10V abrasion 214 tester, and then the antimicrobial activity of the abraded surface is assessed. The sponge (Brite Non-Scratch Scrub Sponge, model C05068) is initially autoclaved and left in laminar flow hood to completely dry overnight. Next, the sponge is placed in 20 mL of disinfectant for ten minutes and then the partially wet sponge is attached to the boat of the machine and used to simulate exaggerated wear on coatings. We modified the EPA test by using 70% ethanol instead of their disinfectants because our application is electronic displays and most people use alcohol to clean electronic displays. The tester translates the sponge parallel in contact with the active surface of the sample with a load of 0.45 kg, an amplitude of ~26 cm, and a period of 2.2s/pass. The sponge was wetted with 20 mL of 70% ethanol in water solution prior to the abrasion tests. A single cycle consists of the translating the sponge across the sample 8 times, then 70% ethanol is sprayed on the abrasion platform, and the test coating, and then there is a subsequent 30 minutes waiting period. Ten cycles were performed for a total of 80 passes. A single sponge was used for the first 5 cycles and this was replaced with a second sponge for the second 5 cycles.

## **Repeated Exposure of Bacteria to Coating**

In order to determine the efficacy of this coating after multiple exposure to microbes, a series of exposure/bacterial assay/cleaning steps were carried out on the coating. First, a 10  $\mu\text{m}$  droplet containing  $2.6 \times 10^5$  CFU of *P. aeruginosa* was placed for on the coating. After one hour, the coating was put in 5 mL DI water, vortexed for 1 min and then sonicated for 1 min and the eluant was used in CFU measurements. Next, the previously used samples were recovered and cleaned. Cleaning consisted of soaking in 3% Lysol® for 30 min followed by 3x rinsing with 70% ethanol in water and 3x rinsing with DI water. Samples were then dried for 15 minutes before the next exposure. Figure S16 shows the antibacterial activity of this coating after 4 exposure cycles.

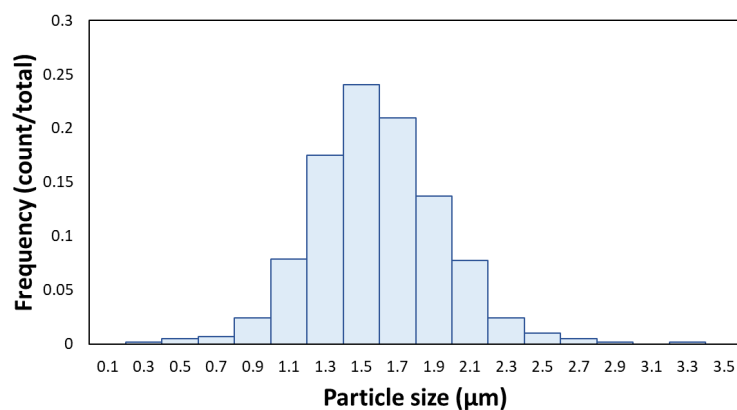

**Figure S1** Ag<sub>2</sub>O particle size distribution. Results show average and median size of 1.5 µm. Over 300 particles were included in size analysis and SEM images were analyzed using ImageJ.

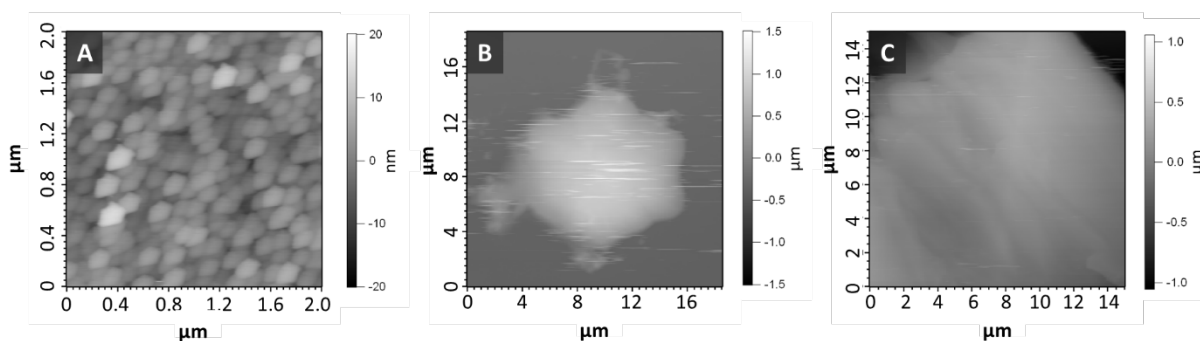

**Figure S2** AFM images showing the height of the particles in the coating. A) Region where particles are not present, B) region with particle, and C) the surface of a particle in the coating. Note that large change in vertical scale between parts A and B.

**Table S1** Surface elemental analysis of coating by EDS. Two regions of Ag<sub>2</sub>O-coating were tested, we expect an Ag:O ratio of 2:1 whereas we observe 2.5: 1.

|             | %Ag  | %O   | Ag/O |
|-------------|------|------|------|
| Region 1    | 68.7 | 31.3 | 2.2  |
| Region 2    | 73.7 | 26.3 | 2.8  |
| Mean value% | 71.2 | 28.8 | 2.5  |

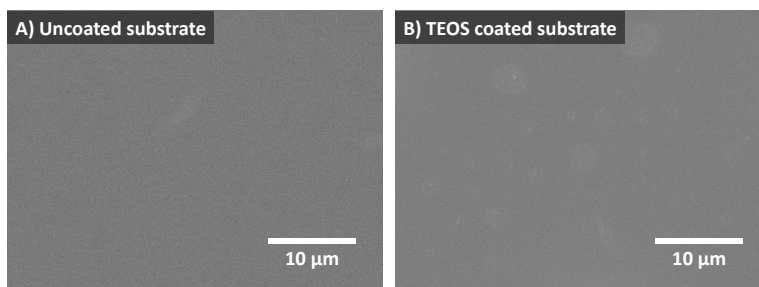

**Figure S3** SEM images of A) uncoated substrate and B) TEOS coated substrate. Without the  $\text{Ag}_2\text{O}$  particles, the surface is very smooth and shows no features in SEM.

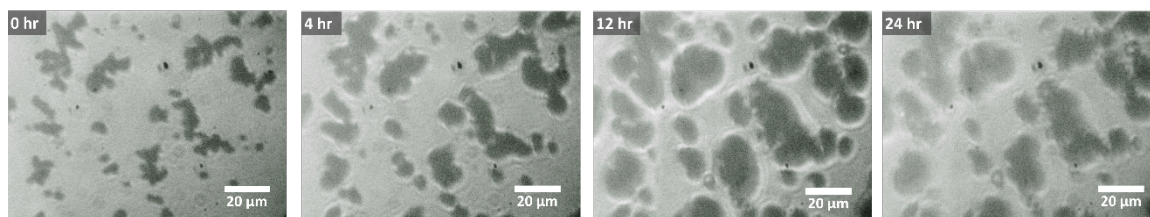

**Figure S4** Time lapse of sol-gel reaction: During the sol-gel reaction, particles will be partially dissolve and self-assemble to form the final morphology of particles in the coating.

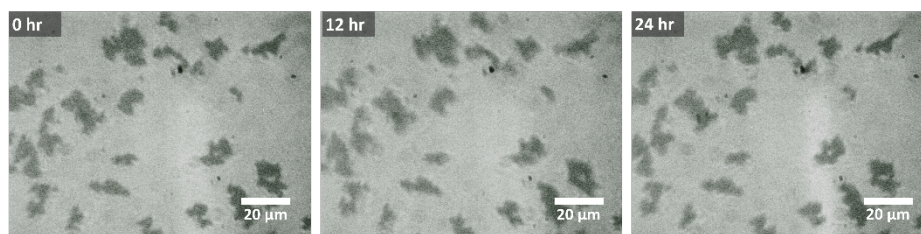

**Figure S5** The effect of ammonia on the morphology of silver oxide particles. These light microscope images show the time course of film formation when no ammonia is present. By comparison to Figure S3, it is clear that the  $\text{Ag}_2\text{O}$  particles do not change morphology, so the change is caused by ammonia. Note that ammonia is necessary for the sol-gel reaction, so the coatings shown in this figure are not robust because silica does not form.

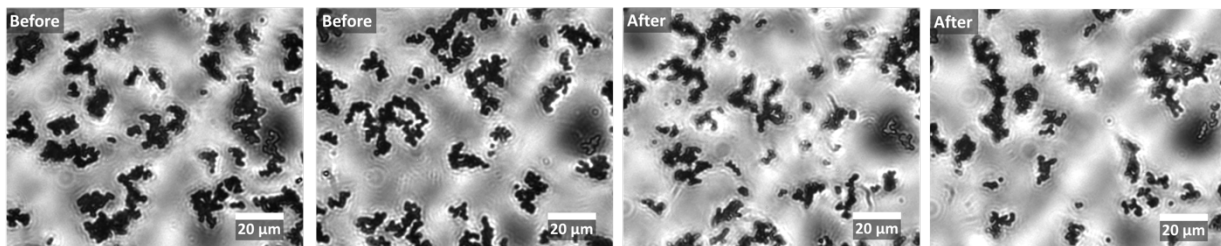

**Figure S6** The effect of heat treatment on the morphology of silver oxide particles. Comparison of the surface before and after one hour of heat treatment at 50 °C shows no change on a 1-20 μm scale. Images were captured using a Zeiss Axio Imager M2 microscope transmission mode.

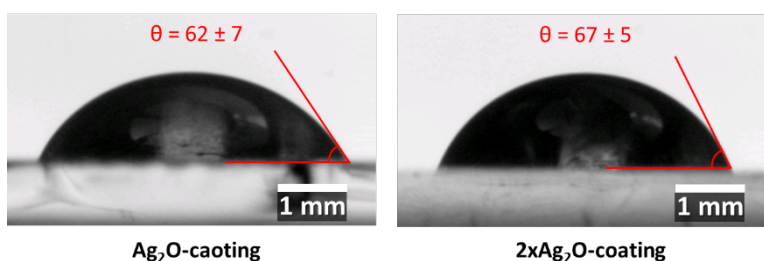

**Figure S7** Photographs of 10 μL water droplets on the coatings. Numbers in red indicate the 95% confidence interval of static contact angle values for Ag<sub>2</sub>O and 2xAg<sub>2</sub>O coatings. The 95% confidence interval of advancing and receding contact angle values are 71.5±5 and 31±9 for Ag<sub>2</sub>O-coating and 75±1 and 35±4 for 2xAg<sub>2</sub>O-coating respectively.

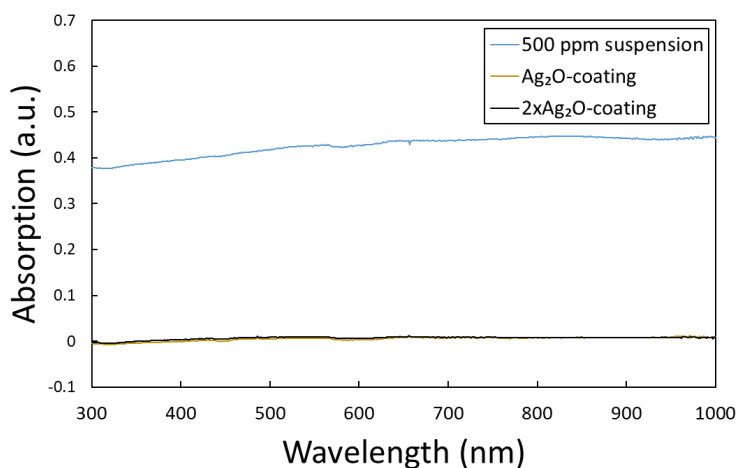

**Figure S8** Test of attachment of particles. UV-Vis spectra of suspended particles after the coating was sonicated in ethanol. Any particles that are removed by sonication end up in suspension and reduce transmittance of light. Ag<sub>2</sub>O suspension is shown for comparison. If all the particles were removed, there would be 170 ppm in the Ag<sub>2</sub>O suspension and 340 ppm in the 2xAg<sub>2</sub>O suspension. The absorption of a 500 ppm Ag<sub>2</sub>O suspension is shown for comparison. The lack of absorption indicates that few particles were removed by sonication.

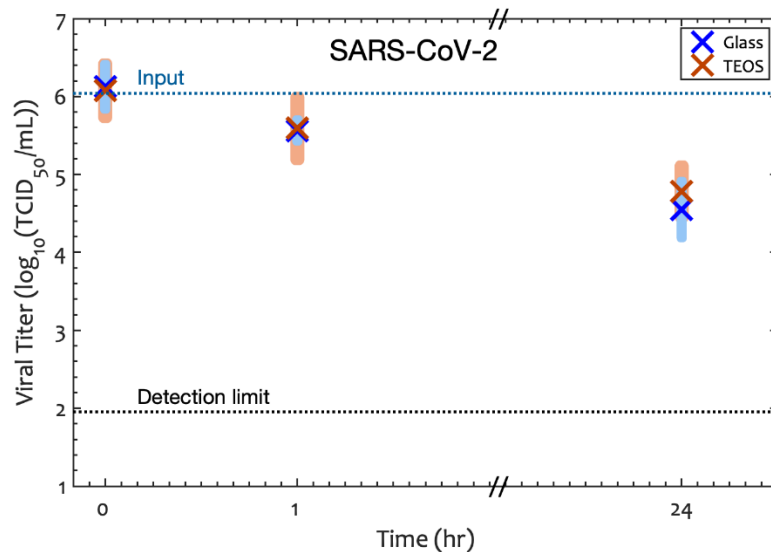

**Figure S9** Comparison between SARS-COV-2 titer on TEOS-coated glass and uncoated glass over time. Shaded rectangles represent the 95% confidence interval and × represents the average of the log of the viral titer at each time point. There was not a significant difference for the TEOS-coated samples (Student’s t-test, two tailed, unpaired,  $p = 0.82$ ).

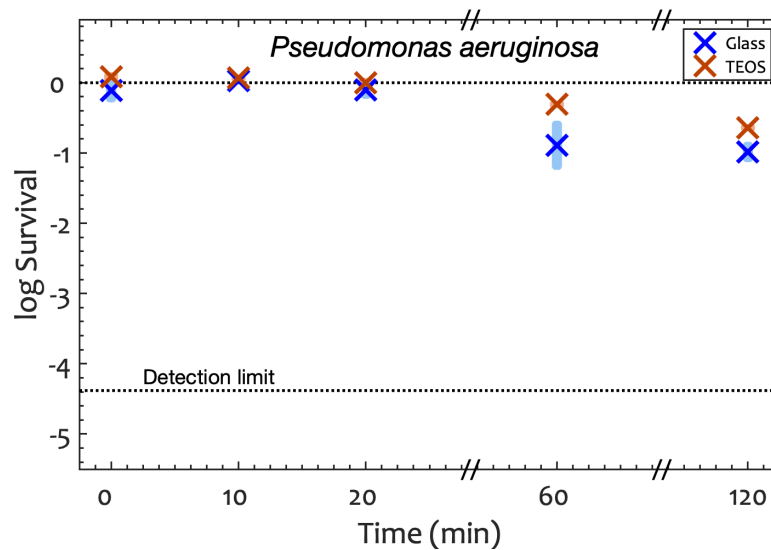

**Figure S10** The Comparison of the survival of *P. aeruginosa* on TEOS and glass over time. Shaded rectangles represent the 95% confidence interval and × represents the average of the log<sub>10</sub>(Survival) at each time point. The results obtained from TEOS samples do not demonstrate a significant difference compared to glass (Student’s t-test, two tailed, unpaired,  $p = 0.13$ ).

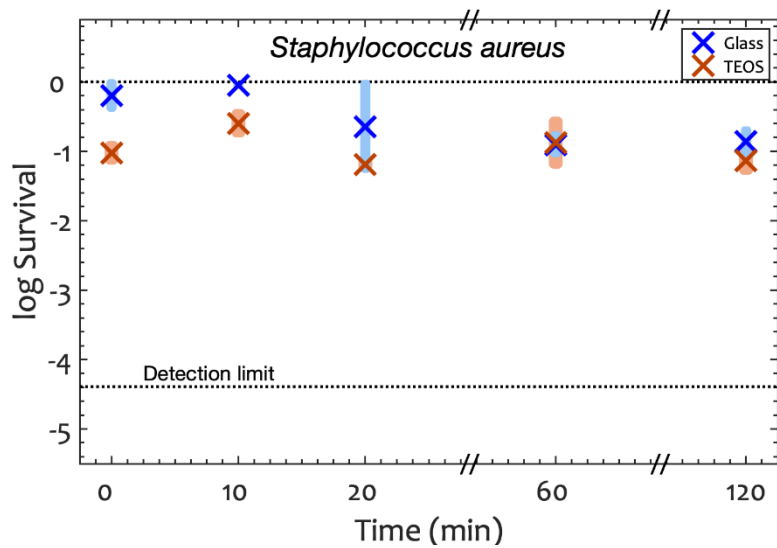

**Figure S11** Comparison of the survival of *S. aureus* colony on TEOS and glass over time. Shaded rectangles represent the 95% confidence interval and × represents the average of the log<sub>10</sub>(Survival) at each time point. The results obtained from TEOS samples do not demonstrate a significant difference compared to glass (Student’s t-test, two tailed, unpaired, p= 0.22).

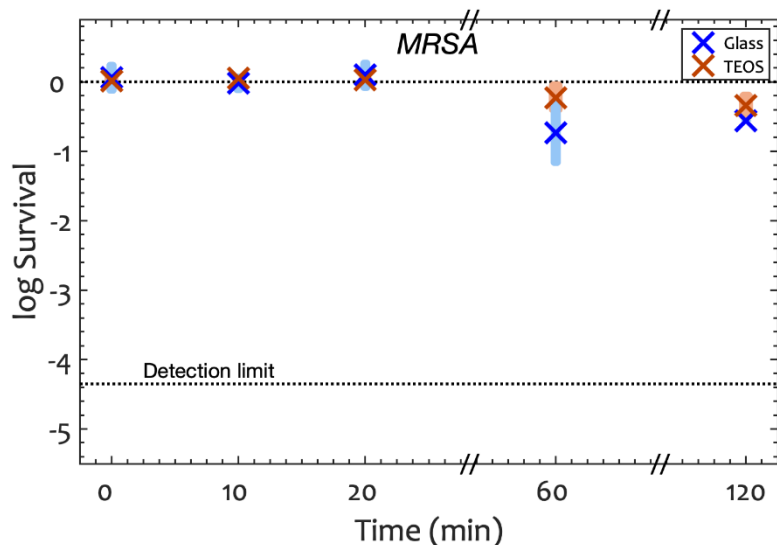

**Figure S12** Comparison of the survival of MRSA on TEOS and glass over time. Shaded rectangles represent the 95% confidence interval and × represents the average of the log<sub>10</sub>(Survival) at each time point. The results obtained from TEOS samples do not demonstrate a significant difference compared to glass (Student’s t-test, two tailed, unpaired, p= 0.64).

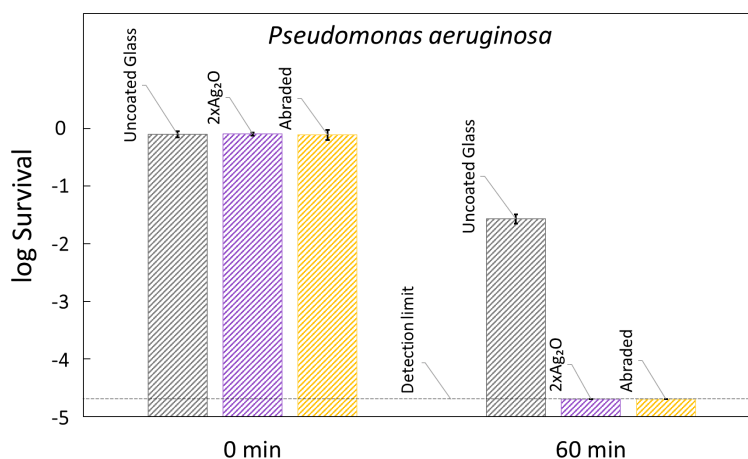

**Figure S13** The effect of abrasion in the antibacterial properties of 2xAg<sub>2</sub>O coating against *P. aeruginosa* and MRSA. The antibacterial properties remained unchanged after 10 abrasion cycles. Error bars show the 95% confidence intervals. The reduction after 1 h is greater than 99.9% on both the 2xAg<sub>2</sub>O and the abraded-2xAg<sub>2</sub>O.

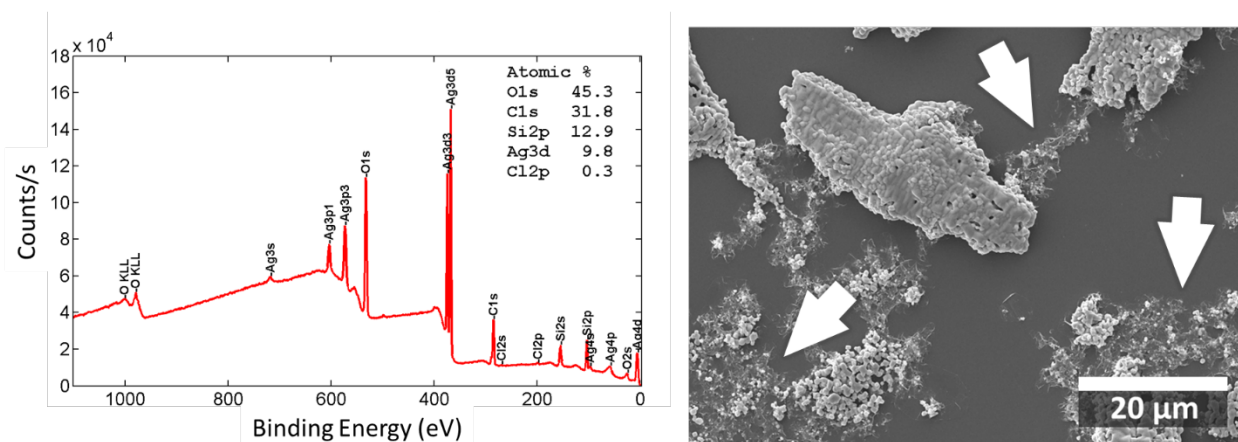

**Figure S14** Characterization of M-2xAg<sub>2</sub>O-coating. Left: elemental analysis results from XPS shows more silicon compared to 2xAg<sub>2</sub>O-coating, which is in agreement with the procedure used and also the right side SEM image. Right: SEM image of the coating. Arrows show the presence of excess silica on the surface that leads to a higher level of adhesion of the particles on the coating.



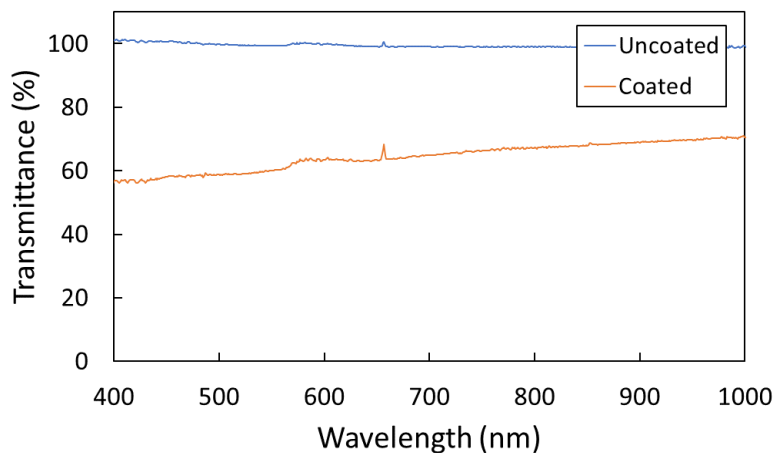

**Figure S15** UV-Vis transmission spectrum of uncoated glass and M-2xAg<sub>2</sub>O-coating shows that the films demonstrate more than 57-68% transparency in the visible range (400-700 nm). Results show that obtaining M-2xAg<sub>2</sub>O-coating without a major loss in transparency of the 2xAg<sub>2</sub>O-coating.

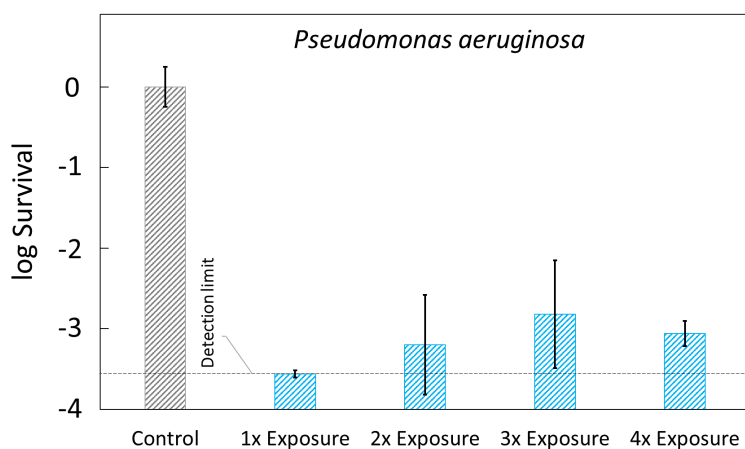

**Figure S16** The effect of multiple bacteria exposure/sonicating/vortexing/titration/cleaning on M-2xAg<sub>2</sub>O coating. 95% confidence intervals indicate more than 99.9% killing of *P. aeruginosa* was observed after 1 h with the bacteria in contact with the coating after each four cycles. Error bars show the 95% confidence intervals.

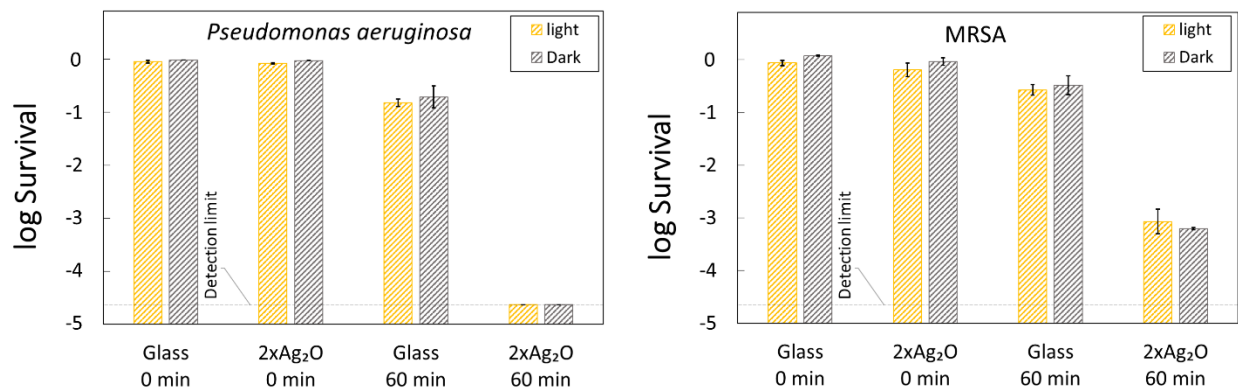

**Figure S17** The effect of light on the antibacterial properties of the 2xAg<sub>2</sub>O coating. *P. aeruginosa* and MRSA were tested. Student's t-test result did not show a significant difference between the CFU measurements in visible light and dark at 0 h or 1 hr ( $p \gg 0.05$ ). Error bars show the 95% confidence intervals. Results show that the antibacterial activity of 2xAg<sub>2</sub>O coating is retained in dark condition. Experiments in dark were done in darkness, except for the faint red light generated by the flame used to sterile microbiological tools. Experiments in the light were done with illumination by an Acuity LED light source within a biological safety cabinet.

**Table S2** SARS-COV-2 TCID<sub>50</sub>/mL assay results for Figure 4. The detection limit for the measurements is 90 TCID<sub>50</sub>/mL and < indicates that the virus titer was less than the detection limit.

| Material                    | Time   | TCID <sub>50</sub> /ml |          |          | log (TCID <sub>50</sub> /ml) |       |       |
|-----------------------------|--------|------------------------|----------|----------|------------------------------|-------|-------|
|                             |        |                        |          |          |                              |       |       |
| Nil (virus input control)   |        | 508079.8               | 508079.8 | 1495140  | 5.705                        | 5.705 | 6.174 |
| Glass                       | 0      | 5080798                | 508079.8 | 1855376  | 6.705                        | 5.705 | 6.268 |
|                             |        | 1606690                | 1166925  | 615552.8 | 6.205                        | 6.067 | 5.789 |
|                             | 1 h    | 692703.4               | 194654.9 | 372663.3 | 5.840                        | 5.289 | 5.571 |
|                             |        | 419371.2               | 472804.9 | 235829.8 | 5.622                        | 5.674 | 5.372 |
|                             | 24 h   | 7824.056               | 34615.08 | 15587.41 | 3.893                        | 4.539 | 4.192 |
|                             |        | 74575.92               | 50807.98 | 117846.5 | 4.872                        | 4.705 | 5.071 |
| TEOS                        | 0 min  | 1606690                | 1656113  | 639634.6 | 6.205                        | 6.219 | 5.805 |
|                             | 60 min | 194654.9               | 508079.8 | 615552.8 | 5.289                        | 5.705 | 5.789 |
|                             | 1 day  | 109462.5               | 41937.12 | 47280.49 | 5.039                        | 4.622 | 4.674 |
| Ag <sub>2</sub> O-coating   | 0 min  | 1204847                | 615552.8 | 1326168  | 6.080                        | 5.789 | 6.122 |
|                             | 60 min | 61555.28               | 41937.12 | 50807.98 | 4.789                        | 4.622 | 4.705 |
|                             | 1 day  | 1606.69                | 677.535  | 745.759  | 3.205                        | 2.830 | 2.872 |
| 2xAg <sub>2</sub> O-coating | 0 min  | 132616.8               | 1326168  | 467969.6 | 5.122                        | 6.122 | 5.670 |
|                             | 60 min | 639.634                | 4366.591 | 6339.95  | 2.805                        | 3.640 | 3.802 |
|                             | 1 day  | <                      | <        | <        | <                            | <     | <     |

**Table S3** *Pseudomonas aeruginosa* CFU data for Figure 5. The detection limit for the measurements is 50 CFU and < indicates that the bacterium colony forming units were less than the detection limit.

| Material                         | Time (min) | CFU     |         |         | log (CFU) |       |       |
|----------------------------------|------------|---------|---------|---------|-----------|-------|-------|
| Nil<br>(Bacterium input control) |            | 1205000 | 1145000 | 1255000 | 6.080     | 6.058 | 6.098 |
| Glass                            | 0          | 1285000 | 1315000 | 1425000 | 6.108     | 6.118 | 6.153 |
|                                  |            | 1010000 | 1250000 | 1020000 | 5.777     | 5.869 | 5.781 |
|                                  | 10         | 1325000 | 1285000 | 1245000 | 6.122     | 6.108 | 6.095 |
|                                  | 20         | 1120000 | 1210000 | 1280000 | 5.822     | 5.855 | 5.880 |
|                                  |            | 1225000 | 1255000 | 1245000 | 6.088     | 6.098 | 6.095 |
|                                  | 60         | 105000  | 190000  | 175000  | 4.794     | 5.051 | 5.016 |
|                                  |            | 160000  | 215000  | -       | 5.474     | 5.602 | -     |
| 120                              | 75000      | 60000   | -       | 5.145   | 5.048     | -     |       |
| TEOS                             | 0          | 1360000 | 1435000 | 1595000 | 6.133     | 6.156 | 6.202 |
|                                  | 10         | 1330000 | 1430000 | 1460000 | 6.123     | 6.155 | 6.164 |
|                                  | 20         | 1260000 | 1090000 | 1270000 | 6.100     | 6.037 | 6.103 |
|                                  | 60         | 590000  | 635000  | 565000  | 5.770     | 5.802 | 5.752 |
|                                  | 120        | 270000  | 260000  | 290000  | 5.431     | 5.414 | 5.462 |
| Ag <sub>2</sub> O-coating        | 0          | 1230000 | 1000000 | 1370000 | 6.089     | 6.000 | 6.136 |
|                                  |            | 1970000 | 1895000 | 1905000 | 6.067     | 6.050 | 6.052 |
|                                  | 10         | 635000  | 805000  | 735000  | 5.802     | 5.905 | 5.866 |
|                                  | 20         | 243000  | 272000  | 189000  | 5.158     | 5.207 | 5.049 |
|                                  |            | 245000  | 190000  | 190000  | 5.389     | 5.278 | 5.278 |
|                                  | 60         | <       | <       | <       | <         | <     | <     |
|                                  |            | <       | <       | -       | <         | <     | -     |
| 120                              | <          | <       | -       | <       | <         | -     |       |
| 2xAg <sub>2</sub> O-coating      | 0          | 1135000 | 1425000 | 1325000 | 6.054     | 6.153 | 6.122 |
|                                  |            | 1520000 | 1415000 | 1355000 | 5.954     | 5.923 | 5.904 |
|                                  | 10         | 450000  | 435000  | 470000  | 5.653     | 5.638 | 5.672 |
|                                  | 20         | 82500   | 106500  | 95000   | 4.689     | 4.800 | 4.750 |
|                                  |            | 80000   | 70000   | 130000  | 4.903     | 4.845 | 5.113 |
|                                  | 60         | <       | <       | <       | <         | <     | <     |
|                                  |            | <       | <       | -       | <         | <     | -     |
| 120                              | <          | <       | -       | <       | <         | -     |       |

**Table S4** *Staphylococcus aureus* CFU results for Figure 5. The detection limit for the measurements is 50 CFU and < indicates that the bacterium colony forming units were less than the detection limit.

| Material                         | Time (min) | CFU     |         |         | log (CFU) |       |       |
|----------------------------------|------------|---------|---------|---------|-----------|-------|-------|
| Nil<br>(Bacterium input control) |            | 1075000 | 1265000 | 1355000 | 6.031     | 6.102 | 6.131 |
| Glass                            | 0          | 1245000 | 1260000 | 1375000 | 6.095     | 6.100 | 6.138 |
|                                  |            | 130000  | 195000  | 135000  | 5.613     | 5.790 | 5.630 |
|                                  | 10         | 1085000 | 1085000 | 1125000 | 6.03      | 6.035 | 6.051 |
|                                  | 20         | 15000   | 20000   | 30000   | 4.676     | 4.801 | 4.977 |
|                                  |            | 900000  | 1250000 | 1475000 | 5.954     | 6.096 | 6.168 |
|                                  | 60         | 45000   | 35000   | 30000   | 5.153     | 5.044 | 4.977 |
|                                  |            | 137650  | 132800  | -       | 5.380     | 5.364 | -     |
| 120                              | 83050      | 115850  | -       | 5.160   | 5.305     | -     |       |
| TEOS                             | 0          | 100000  | 145000  | 110000  | 5.000     | 5.161 | 5.041 |
|                                  | 10         | 240000  | 330000  | 380000  | 5.380     | 5.518 | 5.579 |
|                                  | 20         | 75000   | 75000   | 90000   | 4.875     | 4.875 | 4.954 |
|                                  | 60         | 100000  | 210000  | 210000  | 5.000     | 5.322 | 5.322 |
|                                  | 120        | 70000   | 110000  | 95000   | 4.845     | 5.041 | 4.977 |
| Ag <sub>2</sub> O-coating        | 0          | 305000  | 355000  | 410000  | 5.484     | 5.550 | 5.612 |
|                                  |            | 575000  | 475000  | 660000  | 6.259     | 6.176 | 6.319 |
|                                  | 10         | 225000  | 150000  | 235000  | 5.352     | 5.176 | 5.371 |
|                                  | 20         | 191500  | 204500  | 146500  | 5.782     | 5.810 | 5.665 |
|                                  |            | 80000   | 160000  | 105000  | 4.903     | 5.204 | 5.021 |
|                                  | 60         | 2500    | 1000    | 500     | 3.897     | 3.500 | 3.198 |
|                                  |            | 1800    | 1700    | -       | 3.255     | 3.230 | -     |
| 120                              | 2400       | 1300    | -       | 3.380   | 3.113     | -     |       |
| 2xAg <sub>2</sub> O-coating      | 0          | 1410000 | 1515000 | 1565000 | 6.149     | 6.180 | 6.194 |
|                                  |            | 210000  | 120000  | 150000  | 5.822     | 5.579 | 5.676 |
|                                  | 10         | 340000  | 375000  | 645000  | 5.531     | 5.574 | 5.809 |
|                                  | 20         | 186500  | 177000  | 66000   | 5.770     | 5.747 | 5.319 |
|                                  |            | 35000   | 60000   | 55000   | 4.544     | 4.778 | 4.740 |
|                                  | 60         | 250     | 250     | 250     | 2.897     | 2.897 | 2.897 |
|                                  |            | 700     | 1200    | -       | 2.845     | 3.079 | -     |
| 120                              | 850        | 700     | -       | 2.929   | 2.845     | -     |       |

**Table S5** MRSA CFU assay results for Figure 5. The detection limit for the measurements is 50 CFU and < indicates that the bacterium colony forming units were less than the detection limit.

| Material                         | Time (min) | CFU     |         |         | log (CFU) |       |       |
|----------------------------------|------------|---------|---------|---------|-----------|-------|-------|
| Nil<br>(Bacterium input control) |            | 1130000 | 1005000 | 1265000 | 6.053     | 6.002 | 6.102 |
| Glass                            | 0          | 800000  | 860000  | 700000  | 5.903     | 5.934 | 5.845 |
|                                  |            | 1265000 | 1400000 | 1395000 | 6.301     | 6.345 | 6.344 |
|                                  | 10         | 1205000 | 1175000 | 900000  | 6.080     | 6.070 | 5.954 |
|                                  | 20         | 1565000 | 1270000 | 1460000 | 6.394     | 6.303 | 6.364 |
|                                  |            | 755000  | 760000  | 1195000 | 5.877     | 5.880 | 6.077 |
|                                  | 60         | 120000  | 40000   | 55000   | 5.279     | 4.801 | 4.940 |
|                                  |            | 530000  | 670000  | -       | 5.724     | 5.826 | -     |
|                                  | 120        | 305000  | 310000  | -       | 5.484     | 5.491 | -     |
| TEOS                             | 0          | 1280000 | 1030000 | 1210000 | 6.107     | 6.012 | 6.082 |
|                                  | 10         | 1345000 | 1275000 | 1205000 | 6.128     | 6.105 | 6.080 |
|                                  | 20         | 1160000 | 1170000 | 1255000 | 6.064     | 6.068 | 6.098 |
|                                  | 60         | 495000  | 705000  | 830000  | 5.694     | 5.848 | 5.919 |
|                                  | 120        | 570000  | 390000  | 600000  | 5.755     | 5.591 | 5.778 |
| Ag <sub>2</sub> O-coating        | 0          | 995000  | 1345000 | 720000  | 5.997     | 6.128 | 5.857 |
|                                  |            | 1565000 | 1435000 | 1835000 | 6.394     | 6.356 | 6.463 |
|                                  | 10         | 755000  | 695000  | 545000  | 5.877     | 5.841 | 5.736 |
|                                  | 20         | 497000  | 419000  | 431000  | 5.896     | 5.822 | 5.834 |
|                                  |            | 650000  | 800000  | 350000  | 5.812     | 5.903 | 5.544 |
|                                  | 60         | 3000    | 10500   | 5500    | 3.676     | 4.221 | 3.940 |
|                                  |            | 6450    | 5400    | -       | 3.809     | 3.732 | -     |
|                                  | 120        | 7850    | 8300    | -       | 3.894     | 3.919 | -     |
| 2xAg <sub>2</sub> O-coating      | 0          | 1370000 | 1215000 | 1935000 | 6.136     | 6.084 | 6.286 |
|                                  |            | 1715000 | 1600000 | 1535000 | 6.434     | 6.403 | 6.385 |
|                                  | 10         | 90000   | 115000  | 55000   | 4.954     | 5.060 | 4.740 |
|                                  | 20         | 545000  | 630000  | 530000  | 5.936     | 5.999 | 5.924 |
|                                  |            | 535000  | 375000  | 560000  | 5.728     | 5.574 | 5.748 |
|                                  | 60         | <       | <       | 100     | <         | <     | 2.199 |
|                                  |            | 1100    | 1150    | -       | 3.041     | 3.060 | -     |
|                                  | 120        | <       | 150     | -       | <         | 2.176 | -     |

**Table S6** *P. aeruginosa* CFU assay results for Figure 7. The detection limit for the measurements is 50 CFU and < indicates that the bacterium colony forming units were less than the detection limit.

| Material                         | Time (min) | CFU    |        |        | log (CFU) |       |       |
|----------------------------------|------------|--------|--------|--------|-----------|-------|-------|
| Nil<br>(Bacterium input control) |            | 850000 | 835000 | 880000 | 5.929     | 5.922 | 5.944 |
| Glass                            | 0          | 605000 | 655000 | 665000 | 5.782     | 5.816 | 5.823 |
|                                  |            | 620000 | 505000 | 610000 | 5.792     | 5.703 | 5.785 |
|                                  |            | 445000 | 420000 | 700000 | 5.648     | 5.623 | 5.845 |
|                                  | 20         | 585000 | 570000 | 450000 | 5.767     | 5.756 | 5.653 |
|                                  |            | 325000 | 410000 | 535000 | 5.512     | 5.613 | 5.728 |
|                                  |            | 545000 | 635000 | 675000 | 5.736     | 5.803 | 5.829 |
|                                  | 60         | 33750  | 28550  | 33300  | 4.528     | 4.456 | 4.522 |
|                                  |            | 45000  | 30000  | 45000  | 4.653     | 4.477 | 4.653 |
|                                  |            | 13300  | 9000   | 11300  | 4.124     | 3.954 | 4.053 |
|                                  | 120        | 11500  | 17000  | 16500  | 4.061     | 4.230 | 4.217 |
|                                  |            | 6150   | 7650   | 5550   | 3.789     | 3.884 | 3.744 |
|                                  |            | 8250   | 8950   | 5950   | 3.916     | 3.952 | 3.775 |
| M-2xAg <sub>2</sub> O-coating    | 0          | 655000 | 690000 | 660000 | 5.816     | 5.839 | 5.820 |
|                                  |            | 695000 | 820000 | 920000 | 5.842     | 5.914 | 5.964 |
|                                  |            | 790000 | 755000 | 720000 | 5.898     | 5.878 | 5.857 |
|                                  | 20         | 142000 | 135000 | 131000 | 5.152     | 5.130 | 5.117 |
|                                  |            | 90500  | 102000 | 97000  | 4.957     | 5.009 | 4.987 |
|                                  |            | 4500   | 5000   | 2000   | 3.653     | 3.699 | 3.301 |
|                                  | 60         | <      | <      | <      | <         | <     | <     |
|                                  |            | <      | <      | <      | <         | <     | <     |
|                                  |            | <      | <      | <      | <         | <     | <     |
|                                  | 120        | <      | <      | <      | <         | <     | <     |
|                                  |            | <      | <      | <      | <         | <     | <     |
|                                  |            | <      | <      | <      | <         | <     | <     |

**Table S7** MRSA CFU assay results for Figure 7. The detection limit for the measurements is 50 CFU and < indicates that the bacterium colony forming units were less than the detection limit.

| Material                            | Time (min) | CFU     |         |         | log (CFU) |       |       |
|-------------------------------------|------------|---------|---------|---------|-----------|-------|-------|
| Nil<br>(Bacterium<br>input control) |            | 875000  | 920000  | 785000  | 5.942     | 5.964 | 5.895 |
|                                     |            | 960000  | 1130000 | 1145000 | 5.982     | 6.053 | 6.059 |
|                                     |            | 1865000 | 1300000 | 1595000 | 6.271     | 6.114 | 6.203 |
| Glass                               | 0          | 860000  | 765000  | 820000  | 5.934     | 5.884 | 5.914 |
|                                     |            | 635000  | 385000  | 540000  | 5.803     | 5.585 | 5.732 |
|                                     |            | 525000  | 1640000 | 935000  | 5.720     | 6.215 | 5.971 |
|                                     | 20         | 675000  | 555000  | 555000  | 5.829     | 5.744 | 5.744 |
|                                     |            | 580000  | 620000  | 770000  | 5.763     | 5.792 | 5.886 |
|                                     |            | 1200000 | 1335000 | 975000  | 6.079     | 6.125 | 5.989 |
|                                     | 60         | 274000  | 205500  | 262000  | 5.438     | 5.313 | 5.418 |
|                                     |            | 133000  | 139000  | 109000  | 5.124     | 5.143 | 5.037 |
|                                     |            | 304500  | 287500  | 307500  | 5.484     | 5.459 | 5.488 |
|                                     | 120        | 143500  | 126000  | 136000  | 5.157     | 5.100 | 5.134 |
|                                     |            | 46500   | 56000   | 39500   | 4.667     | 4.748 | 4.597 |
|                                     |            | 154500  | 105500  | 176000  | 5.189     | 5.023 | 5.246 |
| M-2xAg <sub>2</sub> O-<br>coating   | 0          | 715000  | 710000  | 590000  | 5.854     | 5.851 | 5.771 |
|                                     |            | 727500  | 832500  | 780000  | 5.862     | 5.920 | 5.892 |
|                                     |            | 1420000 | 1325000 | 1165000 | 6.152     | 6.122 | 6.066 |
|                                     | 20         | 191500  | 23250   | 187000  | 5.282     | 4.366 | 5.272 |
|                                     |            | 169000  | 126500  | 68500   | 5.228     | 5.102 | 4.836 |
|                                     |            | 229500  | 209000  | 146500  | 5.361     | 5.320 | 5.166 |
|                                     | 60         | <       | <       | <       | <         | <     | <     |
|                                     |            | <       | <       | <       | <         | <     | <     |
|                                     |            | <       | <       | <       | <         | <     | <     |
|                                     | 120        | <       | <       | <       | <         | <     | <     |
|                                     |            | <       | <       | <       | <         | <     | <     |
|                                     |            | <       | <       | <       | <         | <     | <     |

**Table S8** *P. aeruginosa* CFU assay results for Figure S13. The detection limit for the measurements is 50 CFU and < indicates that the bacterium colony forming units were less than the detection limit.

| Material                            | Time (min) | CFU     |         |         | log (CFU) |       |       |
|-------------------------------------|------------|---------|---------|---------|-----------|-------|-------|
| Nil<br>(Bacterium input control)    |            | 2420000 | 2380000 | 1905000 | 6.384     | 6.377 | 6.280 |
|                                     |            | 1060000 | 1280000 | 1040000 | 6.025     | 6.107 | 6.017 |
| Glass                               | 0          | 1895000 | 2015000 | 2415000 | 6.278     | 6.304 | 6.383 |
|                                     |            | 1705000 | 1945000 | 2245000 | 6.232     | 6.289 | 6.351 |
|                                     |            | 2030000 | 1825000 | 1810000 | 6.307     | 6.261 | 6.258 |
|                                     | 60         | 85000   | 60000   | 60000   | 4.929     | 4.778 | 4.778 |
|                                     |            | 70000   | 65000   | 85000   | 4.845     | 4.813 | 4.929 |
|                                     |            | 60000   | 65000   | 60000   | 4.778     | 4.813 | 4.778 |
| 2xAg <sub>2</sub> O-coating         | 0          | 2100000 | 1995000 | 1810000 | 6.322     | 6.300 | 6.258 |
|                                     |            | 1820000 | 2300000 | 2125000 | 6.260     | 6.362 | 6.327 |
|                                     |            | 1940000 | 1825000 | 2220000 | 6.288     | 6.261 | 6.346 |
|                                     | 60         | <       | <       | <       | <         | <     | <     |
|                                     |            | <       | <       | <       | <         | <     | <     |
|                                     |            | <       | <       | <       | <         | <     | <     |
| Abraded 2xAg <sub>2</sub> O-coating | 0          | 2250000 | 1935000 | 2280000 | 6.352     | 6.287 | 6.358 |
|                                     |            | 1955000 | 1865000 | 1610000 | 6.291     | 6.271 | 6.207 |
|                                     |            | 2170000 | 1810000 | 1635000 | 6.336     | 6.258 | 6.214 |
|                                     | 60         | <       | <       | <       | <         | <     | <     |
|                                     |            | <       | <       | <       | <         | <     | <     |
|                                     |            | <       | <       | <       | <         | <     | <     |



**Table S9** *P. aeruginosa* CFU assays results for Figure S17. The detection limit for the measurements is 50 CFU and < indicates that the bacterium colony forming units were less than the detection limit.

| Material                               | Time (min) | CFU     |         |         | log (CFU) |       |       |
|----------------------------------------|------------|---------|---------|---------|-----------|-------|-------|
| Nil<br>(Bacterium input control)       |            | 1970000 | 2135000 | 2300000 | 6.294     | 6.329 | 6.362 |
| Glass<br>(light)                       | 0          | 1665000 | 2260000 | 2065000 | 6.221     | 6.354 | 6.315 |
|                                        | 0          | 1895000 | 1635000 | 1890000 | 6.278     | 6.214 | 6.276 |
|                                        | 60         | 370000  | 360000  | 380000  | 5.568     | 5.556 | 5.580 |
|                                        | 60         | 240000  | 255000  | 350000  | 5.380     | 5.407 | 5.544 |
| 2xAg <sub>2</sub> O-coating<br>(light) | 0          | 1925000 | 1830000 | 1610000 | 6.284     | 6.262 | 6.207 |
|                                        | 0          | 1860000 | 1525000 | 1865000 | 6.270     | 6.183 | 6.271 |
|                                        | 60         | <       | <       | <       | <         | <     | <     |
|                                        | 60         | <       | <       | <       | <         | <     | <     |
| Glass<br>(Dark)                        | 0          | 1720000 | 2050000 | 2290000 | 6.236     | 6.312 | 6.360 |
|                                        | 0          | 2320000 | 1825000 | 2010000 | 6.365     | 6.261 | 6.303 |
|                                        | 60         | 740000  | 540000  | 635000  | 5.869     | 5.732 | 5.803 |
|                                        | 60         | 200000  | 320000  | 300000  | 5.301     | 5.505 | 5.477 |
| 2xAg <sub>2</sub> O-coating<br>(Dark)  | 0          | 2290000 | 1905000 | 1865000 | 6.360     | 6.280 | 6.271 |
|                                        | 0          | 1640000 | 2090000 | 2260000 | 6.215     | 6.320 | 6.354 |
|                                        | 60         | <       | <       | <       | <         | <     | <     |
|                                        | 60         | <       | <       | <       | <         | <     | <     |

**Table S10** MRSA CFU assays results for Figure S17. The detection limit for the measurements is 50 CFU and < indicates that the bacterium colony forming units were less than the detection limit.

| Material                               | Time (min) | CFU     |         |         | log (CFU) |       |       |
|----------------------------------------|------------|---------|---------|---------|-----------|-------|-------|
| Nil<br>(Bacterium input control)       |            | 995000  | 1215000 | 1435000 | 5.998     | 6.085 | 6.157 |
| Glass<br>(light)                       | 0          | 1240000 | 1035000 | 1180000 | 6.093     | 6.015 | 6.072 |
|                                        | 0          | 835000  | 1175000 | 850000  | 5.922     | 6.070 | 5.929 |
|                                        | 60         | 270000  | 215000  | 310000  | 5.431     | 5.332 | 5.491 |
|                                        | 60         | 315000  | 450000  | 425000  | 5.498     | 5.653 | 5.628 |
| 2xAg <sub>2</sub> O-coating<br>(light) | 0          | 865000  | 1060000 | 1110000 | 5.937     | 6.025 | 6.045 |
|                                        | 0          | 715000  | 540000  | 540000  | 5.854     | 5.732 | 5.732 |
|                                        | 60         | 700     | 750     | 500     | 2.845     | 2.875 | 2.699 |
|                                        | 60         | 1500    | 2000    | 1500    | 3.176     | 3.301 | 3.176 |
| Glass<br>(Dark)                        | 0          | 1215000 | 1660000 | 1570000 | 6.085     | 6.220 | 6.196 |
|                                        | 0          | 1515000 | 1375000 | 1325000 | 6.180     | 6.138 | 6.122 |
|                                        | 60         | 520000  | 745000  | 475000  | 5.716     | 5.872 | 5.677 |
|                                        | 60         | 380000  | 275000  | 200000  | 5.580     | 5.439 | 5.301 |
| 2xAg <sub>2</sub> O-coating<br>(Dark)  | 0          | 725000  | 1120000 | 1110000 | 5.860     | 6.049 | 6.045 |
|                                        | 0          | 1920000 | 1000000 | 1135000 | 6.283     | 6.000 | 6.055 |
|                                        | 60         | 550     | 850     | 1050    | 2.740     | 2.929 | 3.021 |
|                                        | 60         | 550     | 900     | 750     | 2.740     | 2.954 | 2.875 |

## References

(1) Dey, B.; Engley, F. Methodology for Recovery of Chemically Treated *Staphylococcus aureus* with Neutralizing Medium. *Applied and Environmental Microbiology* **1983**, *45* (5), 1533-1537.
